# Supplementary material for: Preclinical Safety and Tolerability of an AAV Vector Expressing TLR9 in Mice and Hamsters
Source: Research Square preprint supplement (doi:10.21203/rs.3.rs-8545024/v1), 2026-01-13
Supplement: Supplementary file 1 [file 8cb0c9a15157d74a9b43946a.pdf]

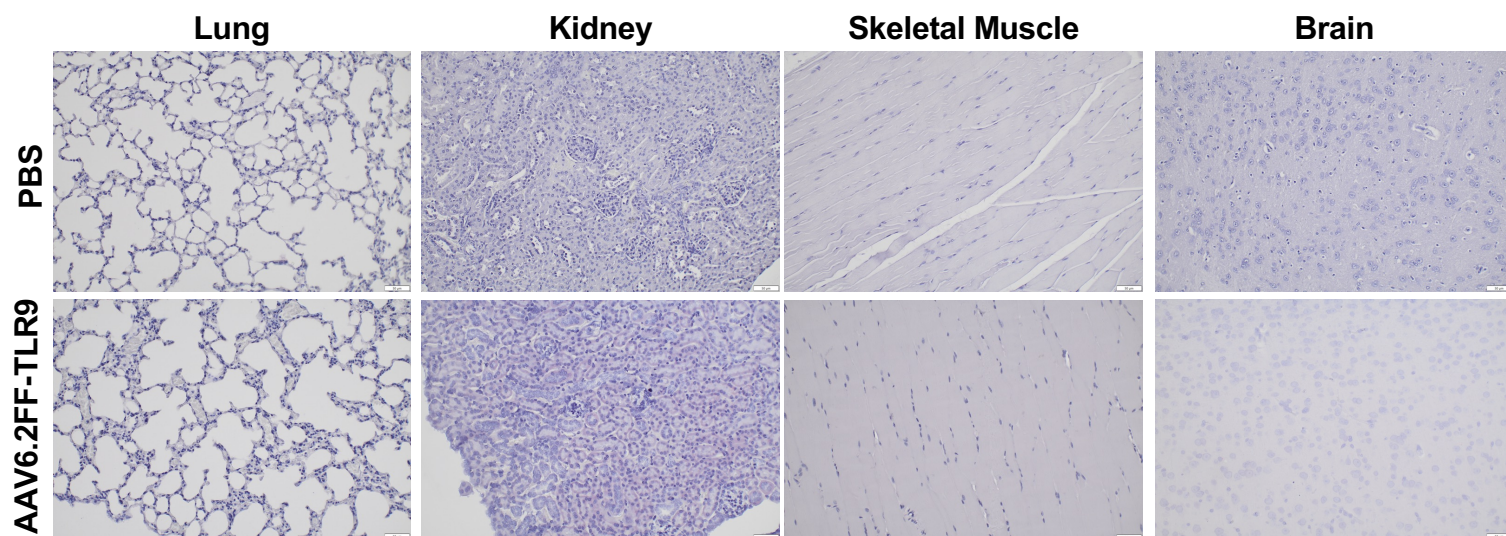

**Supplemental Figure S1. Tissues with no mRNA expression following intraperitoneal administration of AAV6.2FF-TLR9.** 6-week-old female BALB/c mice were injected with either PBS or  $1 \times 10^{11}$ vg of AAV6.2FF-TLR9 and tissues were collected 21 days post-injection. FFPE tissues were incubated with an anti-human TLR9 probe, and the signal was amplified then detected using Fast Red. Nuclei were counterstained with hematoxylin. Scale bars=50um.
